# Supplementary material
Source: publisher figshare collection journal article supplement (https://acs.figshare.com/ndownloader/files/3591822)
Supplement: Supplementary file 1 [file 3591822]

**Supporting Information for:**

**Effect of Tether Conductivity on the Efficiency of  
Photoisomerization of Azobenzene-Functionalized  
Molecules on Au{111}**

**Bala Krishna Pathem,<sup>1,2</sup> Yue Bing Zheng,<sup>1,2,3</sup> John L. Payton,<sup>4</sup> Tze-bin Song,<sup>1,3</sup>  
Byung-Chan Yu,<sup>5</sup> James M. Tour,<sup>5\*</sup> Yang Yang,<sup>1,3\*</sup> Lasse Jensen,<sup>4\*</sup> and Paul S. Weiss<sup>1,2,3\*</sup>**

<sup>1</sup>*California NanoSystems Institute, University of California, Los Angeles, Los Angeles,  
California 90095, United States*

<sup>2</sup>*Department of Chemistry & Biochemistry, University of California, Los Angeles, Los Angeles,  
California 90095, United States*

<sup>3</sup>*Department of Materials Science & Engineering, University of California, Los Angeles, Los  
Angeles, California 90095, United States*

<sup>4</sup>*Department of Chemistry, The Pennsylvania State University, University Park, Pennsylvania  
16802, United States*

<sup>5</sup>*Department of Chemistry and The Smalley Institute for Nanoscale Science and Technology,  
Rice University, Houston, Texas 77005, United States*

\*To whom correspondence should be addressed: [tour@rice.edu](mailto:tour@rice.edu) (J.M.T.); [yangy@ucla.edu](mailto:yangy@ucla.edu)  
(Y.Y.); [jensen@chem.psu.edu](mailto:jensen@chem.psu.edu) (L.J.); [psw@cnsi.ucla.edu](mailto:psw@cnsi.ucla.edu) (P.S.W.)

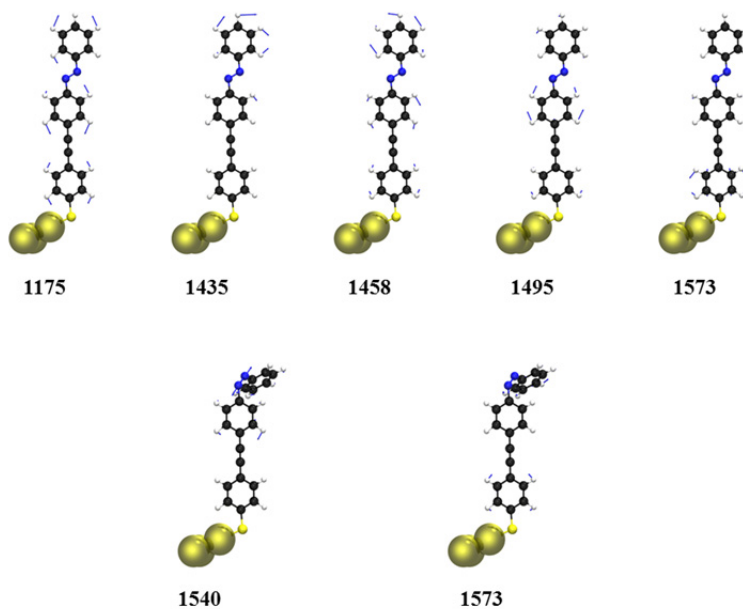

**Supporting Figure S1:** Vibrational modes of all the prominent peaks of **Azo2** attached to a  $\text{Au}_3$  cluster observed in theoretical calculations in their *trans* and *cis* conformations respectively.

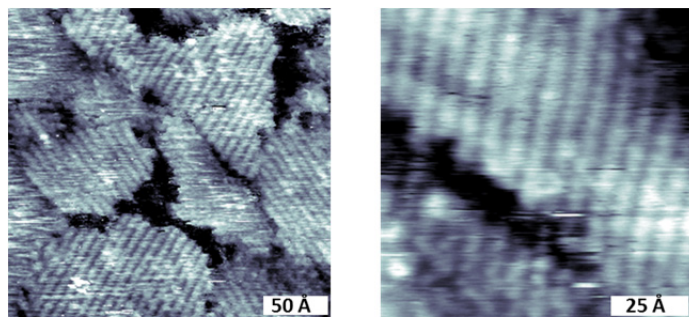

**Supporting Figure S2:** **Azo2** molecules assemble nominally perpendicular to the  $\text{Au}\{111\}$  surface as opposed to the tilted alignment of **Azo1** alkyl tethers. Imaging conditions:  $V_s = -1$  V,  $I = 1$  pA.
